## Genome analysis

# Grouper: graph-based clustering and annotation for improved *de novo* transcriptome analysis

Laraib Malik, Fatemeh Almodaresi and Rob Patro\*

Department of Computer Science, Stony Brook University, Stony Brook, NY 11794, USA

\*To whom correspondence should be addressed.

Associate Editor: Inanc Birol

Received on November 20, 2017; revised on March 26, 2018; editorial decision on April 25, 2018; accepted on May 3, 2018

## Abstract

**Motivation:** *De novo* transcriptome analysis using RNA-seq offers a promising means to study gene expression in non-model organisms. Yet, the difficulty of transcriptome assembly means that the contigs provided by the assembler often represent a fractured and incomplete view of the transcriptome, complicating downstream analysis. We introduce Grouper, a new method for clustering contigs from *de novo* assemblies that are likely to belong to the same transcripts and genes; these groups can subsequently be analyzed more robustly. When provided with access to the genome of a related organism, Grouper can transfer annotations to the *de novo* assembly, further improving the clustering.

**Results:** On *de novo* assemblies from four different species, we show that Grouper is able to accurately cluster a larger number of contigs than the existing state-of-the-art method. The Grouper pipeline is able to map greater than 10% more reads against the contigs, leading to accurate downstream differential expression analyses. The labeling module, in the presence of a closely related annotated genome, can efficiently transfer annotations to the contigs and use this information to further improve clustering. Overall, Grouper provides a complete and efficient pipeline for processing *de novo* transcriptomic assemblies.

**Availability and implementation:** The Grouper software is freely available at <https://github.com/COMBINE-lab/grouper> under the 2-clause BSD license.

**Contact:** [rob.patro@cs.stonybrook.edu](mailto:rob.patro@cs.stonybrook.edu)

**Supplementary information:** [Supplementary data](#) are available at *Bioinformatics* online.

## 1 Introduction

Advances in sequencing technologies have allowed the efficient and accurate exploration of transcriptomes beyond the scope of genetic model organisms (Ekblom and Galindo, 2011; Marioni *et al.*, 2008). Transcriptome sequencing opens the door to understanding gene expression even in species with no high-quality reference genome, which constitutes a vast majority of known species (Martin and Wang, 2011). Some common uses of transcriptome sequencing include variant detection, fusion and alternative splicing event discovery, and differential expression analysis (Soumana *et al.*, 2015; Stubben *et al.*, 2014). In organisms where the transcript sequences are not known a priori, a crucial initial step is assembling the transcriptome using short sequencing reads. In short read sequencing, a

transcriptome is typically sequenced to high depth, resulting in tens to hundreds of millions of reads, which then need to be assembled to reconstruct the original transcript sequences; a process called *de novo* assembly. These transcripts will later act as the ‘reference’ for subsequent analyses. For instance, in a differential analysis pipeline, the reads are first mapped back to the assembled transcripts to infer transcript abundance (Li and Dewey, 2011).

There are many popular tools for assembling the full-length transcripts from short reads by leveraging the redundancies and overlap between reads, such as Trinity (Haas *et al.*, 2013), Oasis (Schulz *et al.*, 2012) and Trans-ABYSS (Robertson *et al.*, 2010). Similarly, there are tools that can be used to improve the quality of the assemblies generated by these methods (Cabau *et al.*, 2017;

Durai and Schulz, 2016). However, despite the powerful algorithms and heuristics adopted, the final output sequences (i.e. contigs) often don't represent the full-length transcripts. In other words, many transcripts are fragmented into a set of non-overlapping contigs. This results from numerous difficulties in assembly including (but not limited to) errors in the sequenced reads, transcriptome complexity arising from alternative splicing and paralogous genes, uneven or insufficient coverage across the length of the sequences molecules, and deficiencies in the underlying approaches used for assembly (e.g. places where the computational problem being solved does not match well with the underlying biology). All of these can lead to a collection of output contigs, which is much larger than the actual set of transcripts assayed.

Because of the potentially low quality of *de novo* assembly output, it is more promising and robust to pursue gene-level differential expression analysis instead of transcript-level (i.e. contig-level) analysis. To obtain gene-level information, we need to infer the contigs that represent parts of the same transcript and those that represent isoforms of the same gene, and group them together. This is what methodologies such as those by Davidson and Oshlack (2014), Pritsyn et al. (2015) and Srivastava et al. (2016) propose. Corset computes a hierarchical clustering based on the shared counts of the contigs, and RapClust clusters a sparse graph, called the mapping ambiguity graph, with nodes representing the contigs, and edges weighted based on the abundances of the contigs sharing common reads. Moreover, for meaningful interpretation of these clusters and various analyses, it is important to have some notion of what the contigs in the *de novo* assembly represent (Garber et al., 2011). Often, we have annotated genomes or transcriptomes from species closely related to the non-model organism under study. This information can be exploited to accurately annotate the contigs of a *de novo* assembly and improve our understanding of the function of the genes that demonstrate differential expression. Traditionally, variants of BLAST (Altschul et al., 1990) are used to perform this annotation and then complete Gene Ontology (GO) analysis (Ji et al., 2012; Parchman et al., 2010).

Currently, several methods exist to process *de novo* assemblies in order to improve downstream analyses and ease the interpretation of results from such analyses. However, each method has its limitations, and apart from Corset, there doesn't exist a tool that provides a complete pipeline for clustering and annotating *de novo* contigs. We introduce Grouper that subsumes and improves on the framework of RapClust and can be used for accurate and efficient processing of *de novo* transcriptome assemblies, to yield clusters of contigs and transfer labels to them from an annotated genome in a matter of tens of minutes. The underlying algorithms in Grouper transfer information from *de novo* assemblies onto a graph, suggesting a useful future direction for *de novo* transcriptome analysis beyond direct sequence analysis of the assembled contigs. The complete Grouper pipeline also provides quantification information that can be used for differential expression analyses. The Grouper software is freely available at <https://github.com/COMBINE-lab/grouper>.

## 2 Materials and methods

### 2.1 Overview

The first step for the analysis of RNA-seq data, in the absence of a reference genome, is generating a *de novo* transcriptome assembly, using tools such as Trinity (Grabherr et al., 2011) and Oases (Schulz et al., 2012). The assemblies tend to have a large number of fractured or incomplete contigs that do not represent full-length transcripts. Grouper aims to cluster these contigs such that, under ideal

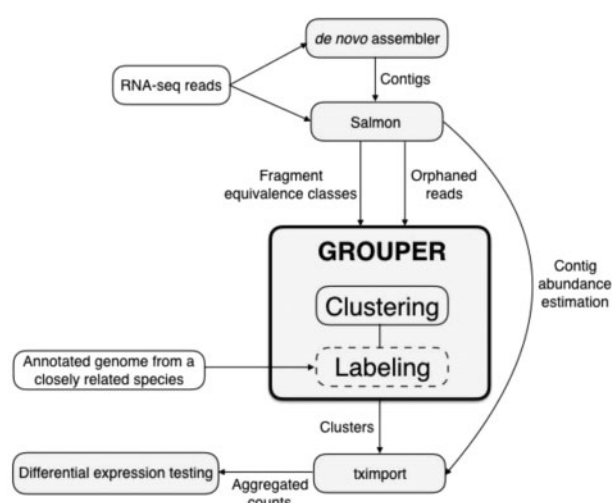

**Fig. 1.** Grouper pipeline: Grouper consists of two modules with different modules, Clustering and Labeling. The goal of Clustering is to put contigs from a *de novo* assembly into groups that represent individual genes. The labeling module assigns a label to each of these clusters using annotated genomes from closely related species. Hence, the labeling step is optional. Grouper needs equivalence classes as input, which can be generated using Salmon on the raw RNA-seq reads. Orphan reads are optionally used in the Clustering module. The output of Grouper are clusters representing a putative contig-to-gene mapping, which may be labeled using an annotated genome from a related species. Quantification estimates can then be summed to the cluster level for downstream differential expression analyses using tximport

conditions, each cluster represents a single gene with its various transcripts. To do so, the original RNA-seq reads are mapped to the assembly using Salmon, which generates quantification estimates and fragment equivalence classes. Each equivalence class contains fragments that are mapped to the same set of contigs from the *de novo* assembly, hence encoding the multi-mapping structure of sequencing reads in relation to a reference. These are processed by Grouper to construct a mapping ambiguity graph, where the nodes are the set of contigs and are connected by edges based on the reads that multi-map between them. This graph is then further improved using quantification estimates and, optionally, orphan read information from Salmon. Annotations can also be added to the graph from the annotated genomes of closely related species using Grouper's labeling module. The final graph is then clustered providing groups of contigs as the output and annotations (if added). Downstream analyses can then be done treating these groups as putative genes. For example using the R tool, tximport (Love et al., 2017), to aggregate abundance estimates to the cluster level, which can then be used for differential expression testing. This complete pipeline is illustrated in Figure 1.

There are two main modules in Grouper: clustering and labeling. The former takes as input the output from Salmon (Patro et al., 2017), where RNA-seq reads are mapped against a *de novo* assembly and quantified. This is used to generate the mapping ambiguity graph and then cluster the unannotated contigs. Clustering module is the main module of Grouper, and the labeling module is built on top of this framework. It is optional and requires an additional input of annotations from species closely related to the one used for assembly. Both of these modules help improve and annotate the assembled contigs for downstream analyses.

### 2.2 Clustering

The clustering module (Supplementary Fig. S1) builds on the work in RapClust, a tool for accurate and fast clustering of contigs from

*de novo* assemblies (Srivastava *et al.*, 2016). The original work makes use of the intrinsic sequence similarity within the contigs, expressed in the form of *equivalence classes*, and the transcript-level expression estimates. The clustering module consists of multiple steps, the first being the construction of the mapping ambiguity graph using *equivalence classes*, generated by *Salmon* during the mapping and quantification phase. The graph,  $G$ , is a weighted, undirected graph with contigs (having at least 10 reads mapped to them) as its vertices. Two vertices are connected by an edge if they share multi-mapping reads, meaning that a read is mapped to both of the contigs. The edge weight is indicative of the amount of similarity between the two contigs, and, as with the weighting function used in *Corset* (Davidson and Oshlack, 2014), is defined based on the number of reads that these contigs share compared to the number of reads that map to each of them individually. Once the graph is constructed, an additional filter accounts for contigs from paralogous genes by removing edges that connect contigs with read counts that vary significantly. Optionally, this graph can be further improved using two steps. The first involves adding edges using orphan reads (as output by *Salmon*), where the ends of a paired-end read map to two different contigs, with similar expression estimates. In the second step, instead of simply removing adjacent contigs with significantly varying read counts, we compute a min-cut separating the two components containing these contigs, forcing them to reside in distinct clusters in the final output. Once the mapping ambiguity graph has been updated, it is clustered using *MCL* (Dongen, 2000), an off-the-shelf graph clustering method, to obtain groups representing a mapping of contigs to genes.

### 2.2.1 Equivalence classes

*Grouper* uses the idea of fragment *equivalence classes* to estimate similarity between two fragments or contigs. Similar notions of *equivalence classes* have previously been defined and used for multiple purposes (Nicolae *et al.*, 2011; Patro *et al.*, 2017; Salzman *et al.*, 2011; Turro *et al.*, 2011). We define an *equivalence class* over a set of fragments on the basis of the transcripts to which the fragments map. Fragments  $f_i$  and  $f_j$  belong to the same *equivalence class* if  $\mathcal{M}(f_i) = \mathcal{M}(f_j)$ , where  $\mathcal{M}(f_i)$  is the set of transcripts to which fragment  $f_i$  maps, and  $\mathcal{M}(f_j)$  is the set of transcripts to which  $f_j$  maps. Each *equivalence class* also has an associated count that is simply the number of equivalent fragments it contains.

### 2.2.2 Graph construction

*Salmon* generates a set of *equivalence classes*,  $\omega = \omega_1, \omega_2, \dots$ . Using these, we define the mapping ambiguity graph,  $G = \langle V, E \rangle$ , as follows:  $V$  is the set of distinct contigs,  $C$ , which are the result of the *de novo* assembly and an edge,  $e_{ij} \in E$ , connects two contigs,  $c_i, c_j \in C$ , if they are in the same *equivalence class*. The weight of each edge,  $w_{ij}$ , is proportional to the total number of reads mapping to both the contigs  $c_i$  and  $c_j$  and is inversely proportional to the total number of reads mapping individually to each of the contigs. We calculate  $w_{ij}$ , weight of edge  $e_{ij}$ , as detailed in Equation (1). In this equation, we show the appearance of a transcript  $c_i$  in an *equivalence class*  $\omega_\ell$  as  $c_i \subseteq \text{lab}(\omega_\ell)$ . A pair of transcripts can appear in different *equivalence classes*, and in combination with several sets of varying contigs, and hence can contribute to multiple edge weight calculations. With *equivalence classes* in hand after read mapping, we use the *equivalence class* counts to calculate the total number of reads coming from a contig as all the reads assigned to a class have been

mapped to all the contigs representing that *equivalence class* during the mapping process.

$$\begin{aligned} w_{ij} &= \frac{N_{ij}}{\min(N_i, N_j)}, \text{ where} \\ N_i &= \sum_{\omega_\ell | \{c_i\} \subseteq \text{lab}(\omega_\ell)} \text{count}(\omega_\ell) \\ N_j &= \sum_{\omega_\ell | \{c_j\} \subseteq \text{lab}(\omega_\ell)} \text{count}(\omega_\ell) \\ N_{i,j} &= \sum_{\omega_\ell | \{c_i, c_j\} \subseteq \text{lab}(\omega_\ell)} \text{count}(\omega_\ell). \end{aligned} \quad (1)$$

### 2.2.3 Filtering

After constructing the mapping ambiguity graph, we apply two main filters, adopted from *Corset* (Davidson and Oshlack, 2014), before clustering it. In the first step, we remove a node and all its connections from the graph if the total number of reads mapping to the representative contig in all the samples is fewer than 10. This reduces the noise in the graph since, based on the number of mapping reads, such a node will have highly weighted edges connecting it to neighbor nodes but is probably a short or misassembled contig. The second filtering step uses quantification information provided by *Salmon* to reduce the number of edges between contigs that have a similar sequence but significantly varying expression estimates across conditions and are, therefore, unlikely to be from the same underlying gene. This filter helps remove contigs that likely originated from paralogous genes and cannot be separated based only on the sequence. Specifically, the filter performs a likelihood ratio test, where the likelihood values are calculated as detailed in Equations S1, S2 and edges with value  $2(\ell_1 - \ell_0) > 20$  are removed from the graph.

### 2.2.4 Orphan reads

The first optional filter in *Grouper* adds edges to the mapping ambiguity graph using information from orphan reads. In a paired-end sequencing run, the output is a series of reads such that each pair of reads is sequenced from a single fragment that originated from the same transcript. Hence, these reads should ideally map to a single contig in the assembly. However, there are cases where one end of the read is mapped to one contig and the other end to a different contig. We call such reads as orphans, as their parent contig is not unique or identifiable. These can occur due to two main reasons. The first is (adversarial) sequencing error, which makes it impossible to correctly identify the original source of the read. The second is misassembled or broken contigs, which are a common artifact of the *de novo* assembly procedure. Since orphan reads provide extra information about which contigs hypothetically originate from the same transcript, we use these reads to join contigs in the underlying mapping ambiguity graph by adding an edge between the two contigs in if they share a pair of orphan reads between them. The edge is only added if the absolute value of the ratio of the expression (TPMs) of the two contigs, calculated by *Salmon*, is less than 2. This reduces the number of false positives in the clustering method, since orphan reads can be caused by errors in the sequencing methodology, or could falsely join together two contigs from distinct transcripts or related genes. Adding an edge in this way helps improve the recall of *Grouper* over other methods.

### 2.2.5 Min-cut filter

The second optional filter uses the likelihood ratio test based on the quantification information, as explained above, but instead of simply removing the edge between the contigs, a min-cut is performed on the graph to completely separate the two contigs into disjoint subsets of the graph. This ensures that in the final graph clustering step, the two contigs are not put into the same cluster based on a longer path joining them. Based on the *de novo* assembly, this min-cut can improve the accuracy of downstream differential expression tests. However, depending on the complexity of the underlying graph structure, this can take a long time to run and is therefore optional. (We note that we have not attempted to optimize the algorithm used to perform the min-cut, and that it is likely that this process can be made considerably faster.)

### 2.3 Labeling

The labeling module (Supplementary Fig. S2) is best considered as a method capable of ‘boosting’ an initial set of annotations by accounting for expression and sequence similarities within the *de novo* assembly rather than being a complete annotation pipeline. Graph-based methods have previously been used to transfer information in biological data as well (Libbrecht et al., 2015). Furthermore, this module not only boosts annotation quality, but also uses these annotations to improve contig-level clustering, which can lead to more accurate differential analysis results. We begin by labeling nodes of the mapping ambiguity graph,  $G$ . This is done by mapping the annotations from a closely related species to the contigs in the *de novo* assembly, using a traditional approach, such as a BLAST search (Altschul et al., 1990). Subsequently, a graph-based semi-supervised learning method for label propagation is used to transfer these initial annotations to unannotated nodes in the graph. For this purpose, we use the adsorption algorithm, which relies on random walks through the graph and has been used to efficiently propagate information through a variety of graphs in its various applications (Baluja et al., 2008). On top of this label propagation, we build an iterative algorithm to modify the topology and edge weights in the graph based on the current labeling. This process is repeated until the topology of the graph converges. The final result of our approach is a collection of annotations for the contigs in the *de novo* assembly and a graph that best represents the relationship between these contigs based on the available sequence and annotation information, which can then be clustered, as before, using MCL.

#### 2.3.1 Initial annotation

The initial labeling can be passed to this step in two formats. Take  $A$  to be the set of contigs from the *de novo* assembly, and  $B$  the set of annotated transcripts from the related species. The first is a simple mapping from  $A$  to  $B$ . The second format consists of two separate files where the first file contains results from a nucleotide BLAST of the *de novo* assembly of the test species against the database constructed using the annotated reference from the related species and vice-versa in the second file. Hence, the first file contains a mapping from  $A$  to  $B$  and the second from  $B$  to  $A$ . In the latter case, the two BLAST files are sorted using the bit score, with ties being broken by the  $e$ -value and contigs are given their corresponding consensus label, with a probability value proportional to the length of overlap between the sequences. The contig is not labeled if no consensus exists, i.e. if the best hit in  $A \rightarrow B$  is not the same as the best hit in  $B \rightarrow A$ . This labeling and the mapping ambiguity graph are passed to the labeling module and it proceeds executing, iteratively, the steps

of its algorithm. In the description of the algorithm, we use the following notation:

- $G^t = (V, E^t)$  is the mapping ambiguity graph at the  $t$ th iteration
- $E^t$  is the edge set at the  $t$ th iteration
- $e \in E^t$  is an edge from  $E^t$  and is an un-ordered pair  $\{u, v\} | u, v \in V$

#### 2.3.2 Edge manipulation

After labeling contigs, edges in the graph are changed, iteratively, in two ways based on the shared labels and edge weights from the prior iterations of the algorithm:

1. Let  $t + 1$  denote the current iteration of the algorithm, and let  $e = \{u, v\} \in E^t$  be an edge in the set  $E^t$  of edges. The weight of  $e$ , denoted as  $w(e)$ , can be updated if there are labels common between two contigs sharing an edge and is calculated as  $((1 - \alpha) \cdot w(e^0)) + (\alpha \cdot \sum_{l \in L} (p_1^l \cdot p_2^l))$ . Here,  $\alpha$  is set to 0.8 for our tests,  $w(e^0)$  is the original edge weight in the input graph (i.e.  $G^0$ ) and  $p_1, p_2$  are probabilities of each contig having a label  $l$  from the set of shared labels,  $L$ . We chose a value for  $\alpha$  based on the species we tested against and show that depending on the proximity of the annotated species to the test species, the effect of this value varies. For species that are more distantly related to the test species, smaller values of  $\alpha$  give better results, since the labels obtained using sequences may not be accurate but are initialized with a probability of 1.0 by default, unless the user specifies other values as input.
2. New edges are added to the graph in cases where two contigs share a label with high probability, but do not have an edge between them. The new edge weight is calculated in the same way as above. However, instead of the original edge weight  $w(e^0)$  (since no edge originally existed), we instead use the median of the edge weights connecting the two vertices to their neighbors in the graph. The edge is only added if the joint probability of shared labels is greater than 0.9. This threshold is chosen to avoid adding a large number of false edges, especially in the first iteration when a majority of labels are likely assigned a probability of 1.0.

#### 2.3.3 Label propagation

Using results from BLAST, a portion of the contigs in the mapping ambiguity graph are labeled. The graph-based, semi-supervised learning algorithm, *adsorption* (Baluja et al., 2008) [we use the implementation from the Junto library (Talukdar and Pereira, 2010)], is used to extend these labels to contigs that have a large number of overlapping mapped reads and, therefore, an edge between them in the graph. The algorithm works by taking random walks through the graph carrying label information. This information is propagated based on three probabilities associated with each node:  $p^{\text{inj}}$ , the probability of stopping the current random walk and emitting a new label,  $p^{\text{abnd}}$ , the probability of completely abandoning the walk and  $p^{\text{cont}}$ , the probability of continuing the random walk with the current label.

We do not run the label propagation algorithm until convergence, since we wish to utilize information at each iteration to update the graph and change the edges. Due to this, labels from the current node are only propagated to all highly connected neighbors, reducing the number of false positives as well. At the end of label propagation, each label associated with a contig has a weight in the range  $(0, 1]$ , and each contig may have up to a maximum of three labels (a limitation of the implementation of the *adsorption* algorithm we adopt). Once the topology of the graph converges,



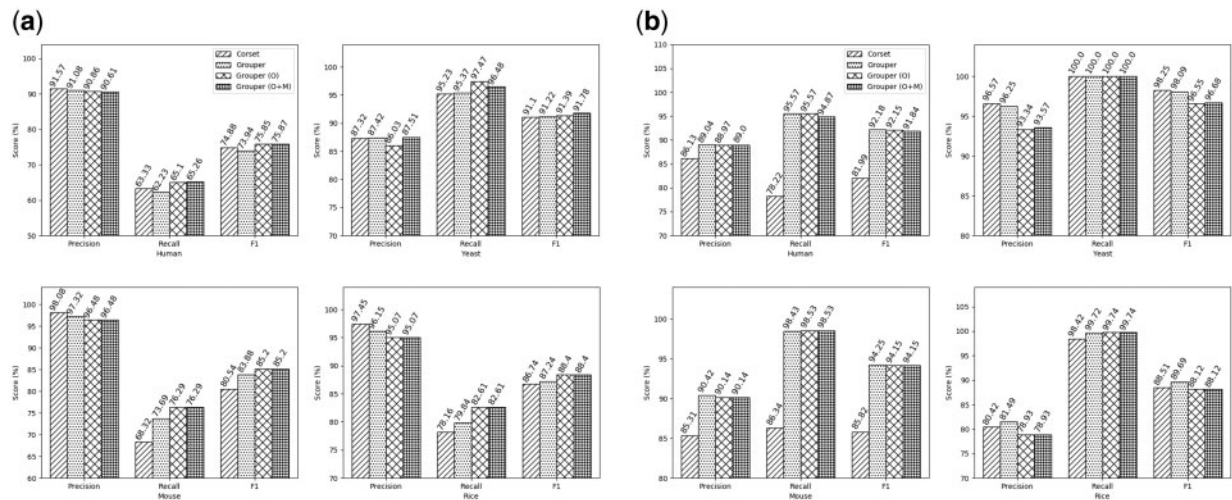

**Fig. 2.** Accuracy results: The precision, recall and F1 scores using different clustering approaches on *de novo* assemblies (a) and reference transcriptomes (b) from the test species

we cluster it as before. The convergence criteria we set in this case is that the number of edges added in the current iteration is less than or equal to 5% of those added in the previous iteration. The final iteration step also outputs a partial mapping from contigs in the *de novo* assembly to transcripts or genes in the related annotated species. Hence, the clusters represent a putative contig-to-gene level mapping and each cluster can be assigned a gene label based on the label for the majority of contigs in the cluster.

### 3 Results

#### 3.1 Test setup

To analyze the performance of different modules in *Grouper*, we ran the tool on datasets from four different organisms, varying in complexity and genome size. We consider datasets from human, mouse and yeast. To check for the effect of assembly quality, we tested our tool assemblies generated using *Trinity* (Grabherr *et al.*, 2011) as well as with the reference transcriptomes of each organism (the latter experiments acting as an upper bound of how we expect the method might perform as the *de novo* assemblies become more accurate and complete). We also included a plant species, Asian rice, in the analysis to show the ability of *Grouper* to process data containing many transcripts with high sequence similarity. Over the four datasets, we compared the clusters produced by *Grouper* against those predicted by the contig clustering method, *Corset* (Davidson and Oshlack, 2014). All results include those from the original *Grouper* algorithm, as well as those with the optional filters applied. We shall refer to the base algorithm as *Grouper*, which is adapted from *RapClust* (Srivastava *et al.*, 2016) and uses only the read counts to filter contigs and edges, *Grouper* (O) refers to the results of *Grouper* considering the orphan read pairs, and *Grouper* (O+M) refers to results after applying both the optional post-processing steps, adding edges using orphan reads and performing min-cuts on the graph using read counts. Details of the datasets and parameters used to run the tools are provided in the [Supplementary Material](#).

#### 3.2 *Grouper* increases the accuracy and speed of clustering

To calculate the accuracy of the clusters produced by different methods, we first mapped reads using *Salmon* (Patro *et al.*, 2017)

(for *Grouper*) and aligned reads using *Bowtie* (Langmead, 2010) (for *Corset*). This step was done with both the assemblies generated by *Trinity* and the annotated reference transcriptomes. Since the ‘true’ clusters in the former case were generated using *BLAST* (see Section 2), they are not guaranteed to be free of errors. To account for this, we ran the same tests on the reference transcriptomes, where the truth was obtained from the annotated genomes. This result suggests how these clustering methods may perform as the quality of the assemblies improves. In both cases, a true positive is counted if two contigs in the same cluster have the same ‘true’ gene label and a false positive if they do not. Conversely, a false negative is counted if two contigs that have the same label under the truth are put in separate groups by the clustering method.

The results from the *de novo* assemblies are shown in [Figure 2a](#). Looking at the F1 scores, *Grouper* performs consistently better than *Corset*, particularly with the inclusion of the two additional filters. In general, *Grouper* clusters have higher recall but slightly lower precision than those predicted by *Corset*. Although the optional filters in *Grouper* do not make a large difference in the accuracy of the clusters, depending on the size of the dataset, we recommend using them since minor differences in the clusters can lead to varying differential expression calls. The total number of contigs clustered in each case does not vary significantly, as shown on the left panel in [Supplementary Table S1](#), except in the case of the human dataset where *Grouper* clusters a much larger number of contigs. In our experiments, both *Grouper* and *Corset* were told to ignore contigs with fewer than 10 reads mapping to them (the default parameter in both tools). However, since both methods use different quantification pipelines, the overall percentage of reads mapped by *Salmon* is much higher, as shown in [Table 1](#). Therefore, within the variants of *Grouper*, only a few extra contigs are included in the graph when considering counts from orphan reads.

To demonstrate the effect of transcriptome assembly methods on the accuracy of the clusters produced, we repeated the same tests on the original transcriptomes (results presented in [Fig. 2b](#)). In the case of human, mouse and rice, *Grouper* performs better than *Corset* in terms of both precision and recall. For the yeast dataset, *Grouper* performs slightly worse. However, it is important to notice that *Grouper* clusters 6725 contigs, whereas *Corset* clusters only 3592, as shown in the right panel of [Supplementary Table S2](#). Hence, *Grouper* discards fewer reads ([Table 1](#)), and therefore contigs, while

maintaining the accuracy of the resulting clusters. The better accuracy of clusters produced by *Grouper*, especially in the case of the human and mouse datasets, show that as transcriptome assembly methods improve, the *Grouper* algorithm may have the ability to perform significantly better than existing contig clustering tools. This, we believe, may also reduce the need for the additional filters.

The time, in seconds, taken for each clustering method is reported in Table 2 and the memory usage in Supplementary Table S3. On the *de novo* assemblies, all variants of *Grouper* are considerably faster than *Corset*, taking a few minutes at most to process the input data and generate clusters. This is also true for the tests using reference transcriptomes, except in the case of human when both the optional filters are enabled. The large runtime on this dataset is due to the computational complexity of repeatedly performing min-cut on the large (and denser) mapping ambiguity graph. The results in Table 2 represents only the time needed for the clustering component of the tools. However, the complete pipeline also includes aligning reads against the input reference sequence. *Corset* takes as input an alignment BAM file, generated using Bowtie, whereas *Grouper* takes as input the *equivalence classes* generated by *Salmon*. We report times for running these two tools on the raw *RNA-seq* reads in Supplementary Table S4. *Salmon* is able to map and quantify reads within minutes, whereas Bowtie can take up to a few hours. Overall, the *Salmon* and *Grouper* pipeline takes only a few minutes to process the sequencing data and generate clusters.

### 3.3 Accuracy in detecting differentially expressed genes

Transcriptome assembly methods tend to produce incomplete or fractured contigs that eventually confound downstream differential expression tests. Hence, it is important that the clusters produced by processing the assembled contigs approximate the actual gene-level expression estimates. To test this, we perform differential expression analysis on the clusters generated by the different methods. Each cluster is given a gene label, which is obtained by taking the contig-to-gene mapping and labeling a cluster with the most frequently occurring gene label among its constituent contigs. Cluster-level expression estimates for *Corset* are provided as output by the tool itself, and for *Grouper*, are obtained using the R package, tximport (Love et al., 2017), to sum read counts provided by *Salmon* to the cluster level. Then, *Limma Voom* (Law et al., 2014) is used to obtain

corrected *P*-values for the hypothesis that each cluster is differentially expressed, calling genes with corrected *P*-value less than or equal to 0.05 as differentially expressed. The same procedure, using counts from *Salmon* or *RSEM* (Li and Dewey, 2011), was repeated for the ‘true’ clustering to obtain ground truth.

We repeated this test on the human and yeast datasets, where we had *RNA-seq* samples under varying conditions. Note that the other datasets only include samples from a single condition, and therefore cannot be used for differential expression analysis. The results from this analysis are presented in Figure 3, and in Supplementary Figure S3. The curve represents the accuracy of the different methods. In the human dataset, the different variants of *Grouper* perform similarly to *Corset*, though they exhibit a slightly lower AUC. On the other hand, in the yeast dataset, *Grouper* variants perform considerably better than *Corset*, performing almost 1.25 times better when run with both the optional filters. This shows that *Grouper* consistently generates good clusters, not just in terms of the accuracy of the actual clustering, but also in terms of downstream analysis performed on them. Interestingly, this test also shows that the accuracy of the clustering itself is not immediately or proportionally reflected in differential gene expression testing accuracy (at least under the testing scheme used here).

### 3.4 Combining information from annotated transcriptomes

For a meaningful interpretation of differential expression analyses, there needs to be some notion of which genes are represented by the individual contigs. Often, we have annotated genomes from species that are closely related to the non-model organism assembled. Information from this annotation can be harvested to accurately annotate contigs from the *de novo* assembly. Traditionally, variants of *BLAST* are used to transfer these annotations. *Corset* also provides a method for transferring annotations by aligning reads against the annotated transcriptome and processing all the alignment files together. We provide a labeling module in *Grouper* that allows for efficiently transferring annotations to the *de novo* assembly and then

**Table 1.** Percentage of reads aligned by each method on the *de novo* assemblies and the reference transcriptomes

|       | <i>De novo</i> assemblies |               | Transcriptomes |               |
|-------|---------------------------|---------------|----------------|---------------|
|       | Bowtie                    | <i>Salmon</i> | Bowtie         | <i>Salmon</i> |
| Human | 86.34                     | 95.76         | 86.99          | 94.72         |
| Yeast | 66.48                     | 97.84         | 56.47          | 87.99         |
| Mouse | 30.74                     | 86.01         | 88.2           | 85.98         |
| Rice  | 82.28                     | 92.36         | 79.45          | 83.8          |

**Table 2.** Clustering time of each method using the *de novo* assemblies and the reference transcriptomes (in seconds)

| <i>De novo</i> assembly |               |                |                    |                      | Transcriptome |                |                    |                      |
|-------------------------|---------------|----------------|--------------------|----------------------|---------------|----------------|--------------------|----------------------|
|                         | <i>Corset</i> | <i>Grouper</i> | <i>Grouper</i> (O) | <i>Grouper</i> (O+M) | <i>Corset</i> | <i>Grouper</i> | <i>Grouper</i> (O) | <i>Grouper</i> (O+M) |
| Human                   | 902.19        | 50.49          | 100.93             | 269.99               | 24479.29      | 154.46         | 296.62             | 549160.99            |
| Yeast                   | 167.8         | 1.92           | 8.67               | 11.28                | 234.6         | 3.23           | 10.07              | 33.06                |
| Mouse                   | 348.91        | 14.31          | 46.12              | 46.12                | 503.54        | 27.65          | 52.65              | 52.65                |
| Rice                    | 234.96        | 37.02          | 74.85              | 74.85                | 259.93        | 12.11          | 24.95              | 24.95                |

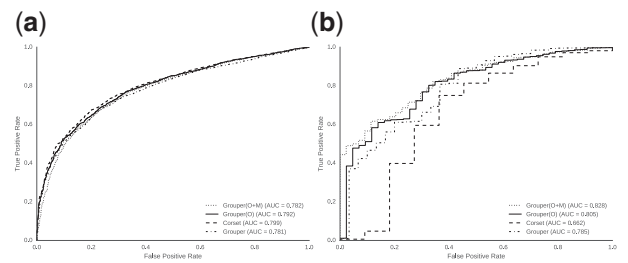

**Fig. 3.** DGE results: The curve represents the accuracy (true positives against false positives) of calling differentially expressed genes using *Salmon* counts as ground truth, represented by the clusters generated by each method in the human (a) and yeast (b) datasets

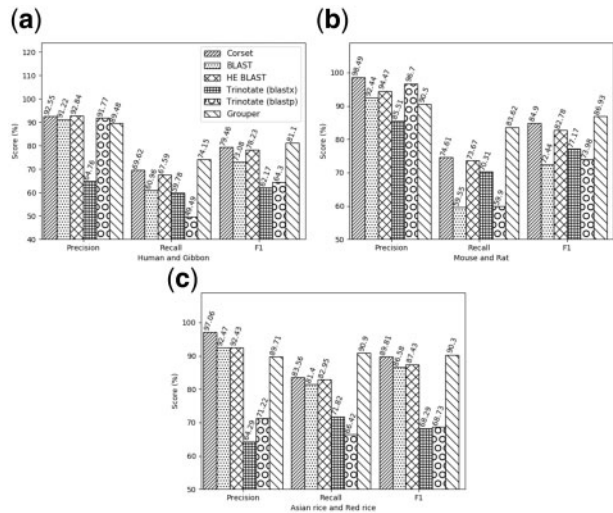

**Fig. 4.** Accuracy results: The precision, recall and F1 scores from different annotations methods on the human genome using the gibbon as a closely related annotated species (a), on the mouse dataset using the rat genome (b), and the Asian rice dataset using the red rice genome (c). Note: HE-BLAST refers to using BLAST to annotate only the contigs that have more than 10 reads mapping to them, as quantified by Salmon

propagating them through the mapping ambiguity graph to eventually annotate a larger number of contigs.

We compare our results against results from *Corset*, *BLAST* using all the contigs in the assembly, *BLAST* using only the contigs that have greater than 10 reads mapping to them, and *Trinotate* (Haas et al., 2013), using both nucleotide and protein level *BLAST* against the SwissProt database. Since there is no obvious and complete mapping between the contigs and annotations from the related species, we choose to compare the different methods based on their ability to give contigs from a single gene the same label and, in turn, cluster them together for down-stream analyses. We did the analysis using an annotated, closely related genome for the human, mouse, and Asian rice datasets. Annotated genomes used were from gibbon, rat and red rice, respectively. The results, presented in Figure 4, show that although precision of the clusters generated by the labeling module in *Grouper* is slightly lower than the next-best method, the gain in recall is significantly higher, resulting in clusters with higher overall F1 scores.

In addition to being accurate, *Grouper* assigns annotations to a greater number of contigs than simply using *BLAST*. This is a benefit of the label propagation step which, in each iteration, makes use of the previous information to continue labeling connected components in the graph. This means that some of the previously unannotated contigs, which could not be annotated on the basis of sequence similarity alone, are labeled by the end of the iterative process. In this way, *Grouper* is able to assign annotations to 2325, 4957 and 3655 extra contigs in human, mouse and rice assemblies, respectively. The larger number of annotations could be helpful in downstream analyses for specific genes. On the other hand, *Corset* does not directly label contigs in the *de novo* assembly but adds the annotated transcripts in clusters along with them. This cluster-level information can then be used to infer annotations, which adds to the complexity of the pipeline.

Along with producing more complete and accurate annotations, *Grouper* is also much faster than the other tools, as shown in Table 3. The time taken for *Grouper* includes the time to run *Salmon* (which generates contig-level abundance estimates), to

**Table 3.** Total time (in minutes) for each pipeline used to annotate contigs in a *de novo* assembly

|       | Corset | Trinotate (nucl.) | Trinotate (prot.) | Grouper |
|-------|--------|-------------------|-------------------|---------|
| Human | 513.28 | 2356.13           | 781.56            | 20.85   |
| Mouse | 272.88 | 1616.01           | 498.3             | 10.23   |
| Rice  | 208.79 | 983.37            | 424.02            | 11.19   |

Note: Note that these results include alignment and quantification times, as well as the clustering time, for *Grouper* and *Corset*.

generate *equivalence classes*, to construct the mapping ambiguity graph, to run *BLAST* to generate the initial contig labels and then to propagate the labels, alter the graph topology and cluster the contigs. Similarly, *Corset* timing includes time to align reads in each sample against the reference. *Grouper* takes 20 min in human, with a total of 23.2 million reads across six samples and 107 389 contigs in the *de novo* assembly. The other species take less than 15 min, with a total of 10.5 million reads and 75 727 contigs in mouse and 8 million reads and 99 745 contigs in rice. In comparison, the other tools take several hours to run on these datasets.

4 Discussion

The analysis of transcriptomic profiles via *RNA-seq* remains a challenge especially when the organism being assayed lacks a high-quality reference transcriptome. Considerable progress has been made in terms of both the sequencing technologies available (providing higher depth and higher quality read information) and the computational approaches used to reconstruct the underlying transcriptome from the output of these sequencing experiments. Yet, even the best available assembly approaches often yield incomplete (and sometimes incorrect) transcript sequences. The fractured nature of these assemblies complicates downstream analyses, such as differential expression analysis, and results in spurious false-positive calls, as well as a loss of statistical power in terms of genes that can truly be identified to be differentially expressed.

Following the general framework originally laid-out by Davidson and Oshlack (2014), we introduce *Grouper*, a tool for processing *de novo* transcriptomic data that groups together assembled contigs into putative genes based on evidence of shared sequence. These putative genes can then be more accurately and stably quantified. We cast this problem of determining transcript groups as one of clustering a mapping ambiguity graph, that we construct using multi-mapping read information. We introduce useful heuristics for both filtering this graph (to remove likely spurious edges), and for augmenting this graph with information obtained from orphan mappings that likely result from the incomplete nature of the underlying assembly. We demonstrate that this clustering problem can be solved efficiently and accurately, and that treating the resulting clusters as putative genes can lead to biologically meaningful analyses.

Simultaneously, we also introduce a novel, graph-based approach for annotating the transcripts in a *de novo* assembly using information from related organisms. Rather than relying only on the sequence similarity between the two references, we also make use of the mapping ambiguity graph that provides evidence of the sequence similarity of the contigs *within* the assembly. We initially label a subset of the contigs (nodes in the graph) with high-confidence labels transferred from a related organism. Then we take advantage of the graph structure by applying a semi-supervised label propagation algorithm (Talukdar and Pereira, 2010), to propagate gene



labels among highly related contigs within the assembly. We demonstrate that, when labeling information from related organisms is included, the labeling scheme that relies on the graph-based label propagation approach moderately outperforms other approaches, measured by the quality of the resulting clusters (Fig. 4). Thus, we show that *Grouper* provides an accurate and efficient way to improve the quality of *de novo* transcriptome analysis by allowing the aggregation of contigs into biologically meaningful groups (putative genes), and that it can effectively make use of related transcriptomes when available. Given its relatively modest computational overhead, we believe that *Grouper* can become a popular tool to help tackle some of the difficult tasks faced in *de novo* transcriptome analysis.

While *Grouper* performs well in our tests, and is able to cluster and annotate contigs from *de novo* assemblies efficiently, there is clearly a limit to the accuracy it can obtain based on the quality and completeness of the underlying *de novo* assembly. This is demonstrated in Figure 2, where we see considerably improved performance of *Grouper* (and *Corset*) when they are provided with the reference assemblies as input. The results of this analysis suggest that a major limiting factor in improving performance is actually the quality of the *de novo* assemblies being produced. While *de novo* transcriptome assembly is known to be a very challenging problem, progress is nonetheless being made both in terms of the computational approaches being developed and in terms of the biotechnologies being brought to bear on the problem. In the future, we are interested in incorporating into *Grouper* the evidence that can be provided by long read transcriptome sequencing (e.g. by PacBio Iso-Seq or nanopore's direct RNA-sequencing technology). While these technologies often do not obtain the same depth of coverage as traditional RNA-seq, and therefore are less likely to sequence rare isoforms, they nonetheless provide high-quality structural information about the expressed transcripts, and we anticipate that such data will be able to provide information about the 'backbone' gene structure by which shorter contigs can be grouped. As the quality of the assemblies improve, we also suggest using *Grouper* without the additional filters that incorporate information from orphan reads.

## Funding

This work was supported by the NSF Division of Biological Infrastructure (Award Number: 1564917).

*Conflict of Interest:* none declared.

## References

- Altschul,S.F. *et al.* (1990) Basic local alignment search tool. *J. Mol. Biol.*, **215**, 403–410.
- Baluja,S. *et al.* (2008). Video suggestion and discovery for YouTube: taking random walks through the view graph. In: *Proceedings of the 17th International Conference on World Wide Web*, pp. 895–904. ACM, Beijing, China.
- Cabau,C. *et al.* (2017) Compacting and correcting trinity and oases rna-seq *de novo* assemblies. *PeerJ*, **5**, e2988.
- Davidson,N.M. and Oshlack,A. (2014) Corset: enabling differential gene expression analysis for *de novo* assembled transcriptomes. *Genome Biol.*, **15**, 410.
- Dongen,S.V. (2000). Graph clustering by flow simulation. PhD Thesis, Standardization and Knowledge Transfer.
- Durai,D.A. and Schulz,M.H. (2016) Informed k mer selection for *de novo* transcriptome assembly. *Bioinformatics*, **32**, 1670–1677.
- Eklblom,R. and Galindo,J. (2011) Applications of next generation sequencing in molecular ecology of non-model organisms. *Heredity*, **107**, 1.
- Garber,M. *et al.* (2011) Computational methods for transcriptome annotation and quantification using rna-seq. *Nat. Methods*, **8**, 469–477.
- Grabherr,M.G. *et al.* (2011) Full-length transcriptome assembly from rna-seq data without a reference genome. *Nat. Biotechnol.*, **29**, 644–652.
- Haas,B.J. *et al.* (2013) De novo transcript sequence reconstruction from rna-seq: reference generation and analysis with trinity. *Nat. Protoc.*, **8**, 1494.
- Ji,P. *et al.* (2012) Characterization of common carp transcriptome: sequencing, *de novo* assembly, annotation and comparative genomics. *PLoS One*, **7**, e35152.
- Langmead,B. (2010) Aligning short sequencing reads with bowtie. *Curr. Protoc. Bioinformatics*, Chapter 11, Unit 11.7.
- Law,C.W. *et al.* (2014) Voom: precision weights unlock linear model analysis tools for rna-seq read counts. *Genome Biol.*, **15**, R29.
- Li,B. and Dewey,C.N. (2011) Rsem: accurate transcript quantification from rna-seq data with or without a reference genome. *BMC Bioinform.*, **12**, 323.
- Libbrecht,M.W. *et al.* (2015) Joint annotation of chromatin state and chromatin conformation reveals relationships among domain types and identifies domains of cell-type-specific expression. *Genome Res.*, **25**, 544–557.
- Marioni,J.C. *et al.* (2008) Rna-seq: an assessment of technical reproducibility and comparison with gene expression arrays. *Genome Res.*, **18**, 1509–1517.
- Martin,J.A. and Wang,Z. (2011) Next-generation transcriptome assembly. *Nat. Rev. Genet.*, **12**, 671–682.
- Nicolae,M. *et al.* (2011) Estimation of alternative splicing isoform frequencies from rna-seq data. *Algorithm. Mol. Biol.*, **6**, 9.
- Parchman,T.L. *et al.* (2010) Transcriptome sequencing in an ecologically important tree species: assembly, annotation, and marker discovery. *BMC Genomics*, **11**, 180.
- Patro,R. *et al.* (2017) Salmon provides fast and bias-aware quantification of transcript expression. *Nat. Methods*, **14**, 417–419.
- Ptitsyn,A. *et al.* (2015) Semantic assembly and annotation of draft rna-seq transcripts without a reference genome. *PLoS One*, **10**, e0138006.
- Robertson,G. *et al.* (2010) De novo assembly and analysis of rna-seq data. *Nat. Methods*, **7**, 909–912.
- Salzman,J. *et al.* (2011) Statistical modeling of rna-seq data. *Stat. Sci.*, **26**, 62.
- Schulz,M.H. *et al.* (2012) Oases: robust *de novo* rna-seq assembly across the dynamic range of expression levels. *Bioinformatics*, **28**, 1086–1092.
- Soneson,C. *et al.* (2015) Differential analyses for RNA-seq: transcript-level estimates improve gene-level inferences. *F1000Res*, **4**.
- Soumana,I.H. *et al.* (2015) Rna-seq *de novo* assembly reveals differential gene expression in *Glossina palpalis gambiensi* infected with *Trypanosoma brucei gambiense* vs. non-infected and self-cured flies. *Front. Microbiol.*, **6**.
- Srivastava,A. *et al.* (2016). Accurate, fast and lightweight clustering of *de novo* transcriptomes using fragment equivalence classes. *arXiv preprint arXiv: 1604.03250*.
- Stubben,C.J. *et al.* (2014) Differential expression of small rnas from *Burkholderia thailandensis* in response to varying environmental and stress conditions. *BMC Genomics*, **15**, 385.
- Talukdar,P.P. and Pereira,F. (2010). Experiments in graph-based semi-supervised learning methods for class-instance acquisition. In: *Proceedings of the 48th Annual Meeting of the Association for Computational Linguistics*, pp. 1473–1481. Association for Computational Linguistics, Uppsala, Sweden.
- Turro,E. *et al.* (2011) Haplotype and isoform specific expression estimation using multi-mapping rna-seq reads. *Genome Biol.*, **12**, R13.
